# Supplementary material for: Genome-wide scan for runs of homozygosity identifies potential candidate genes associated with local adaptation in Valle del Belice sheep
Source: Springer Nature journal article supplement (doi:10.1186/s12711-017-0360-z), 2017-11-14

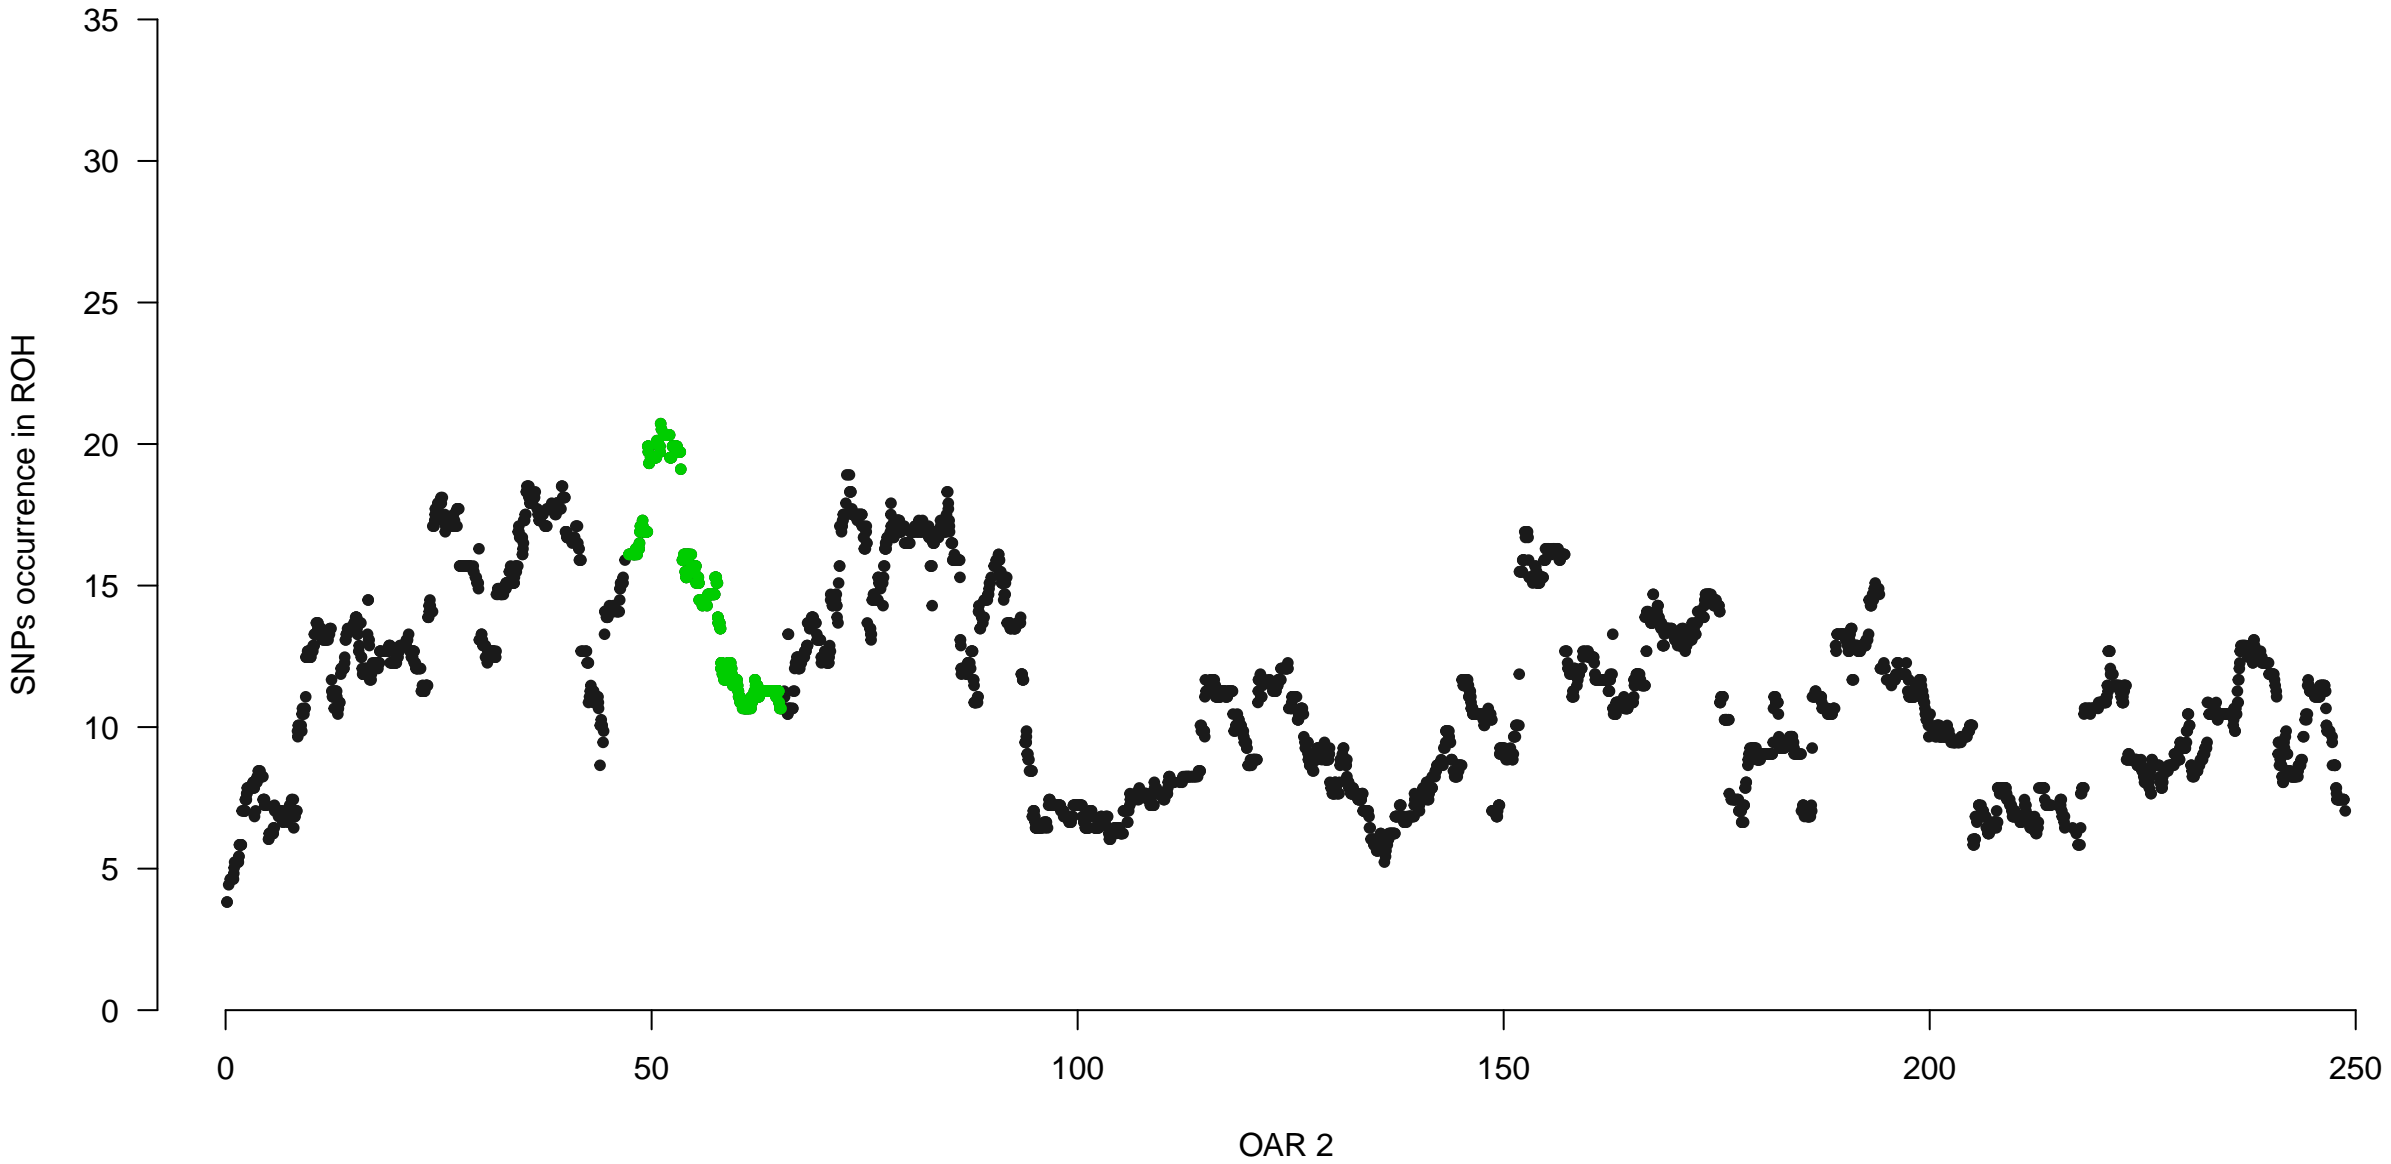

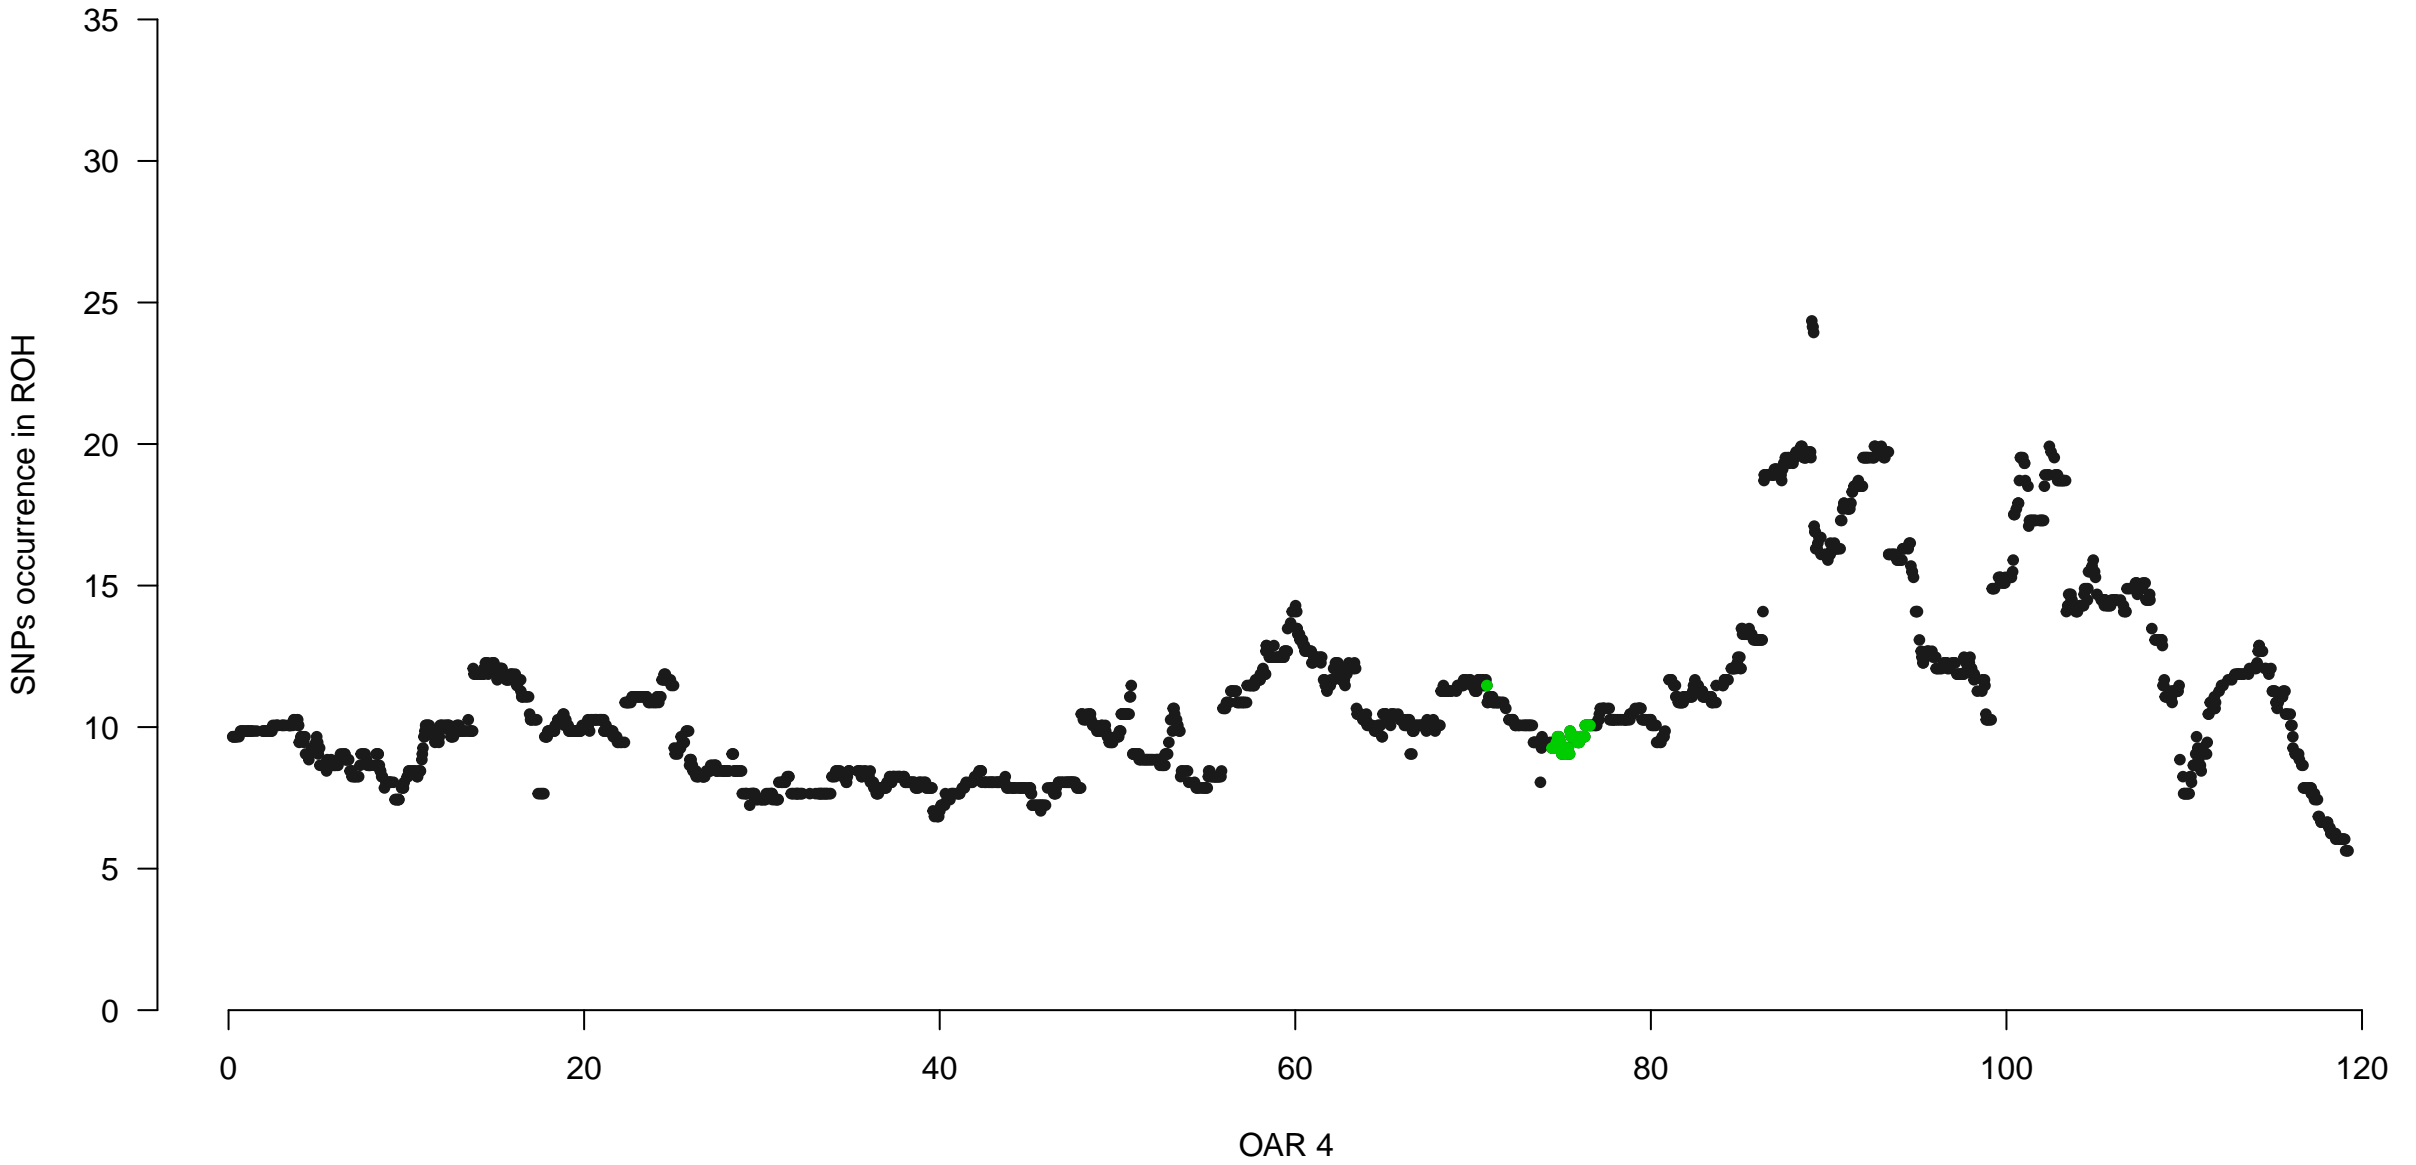

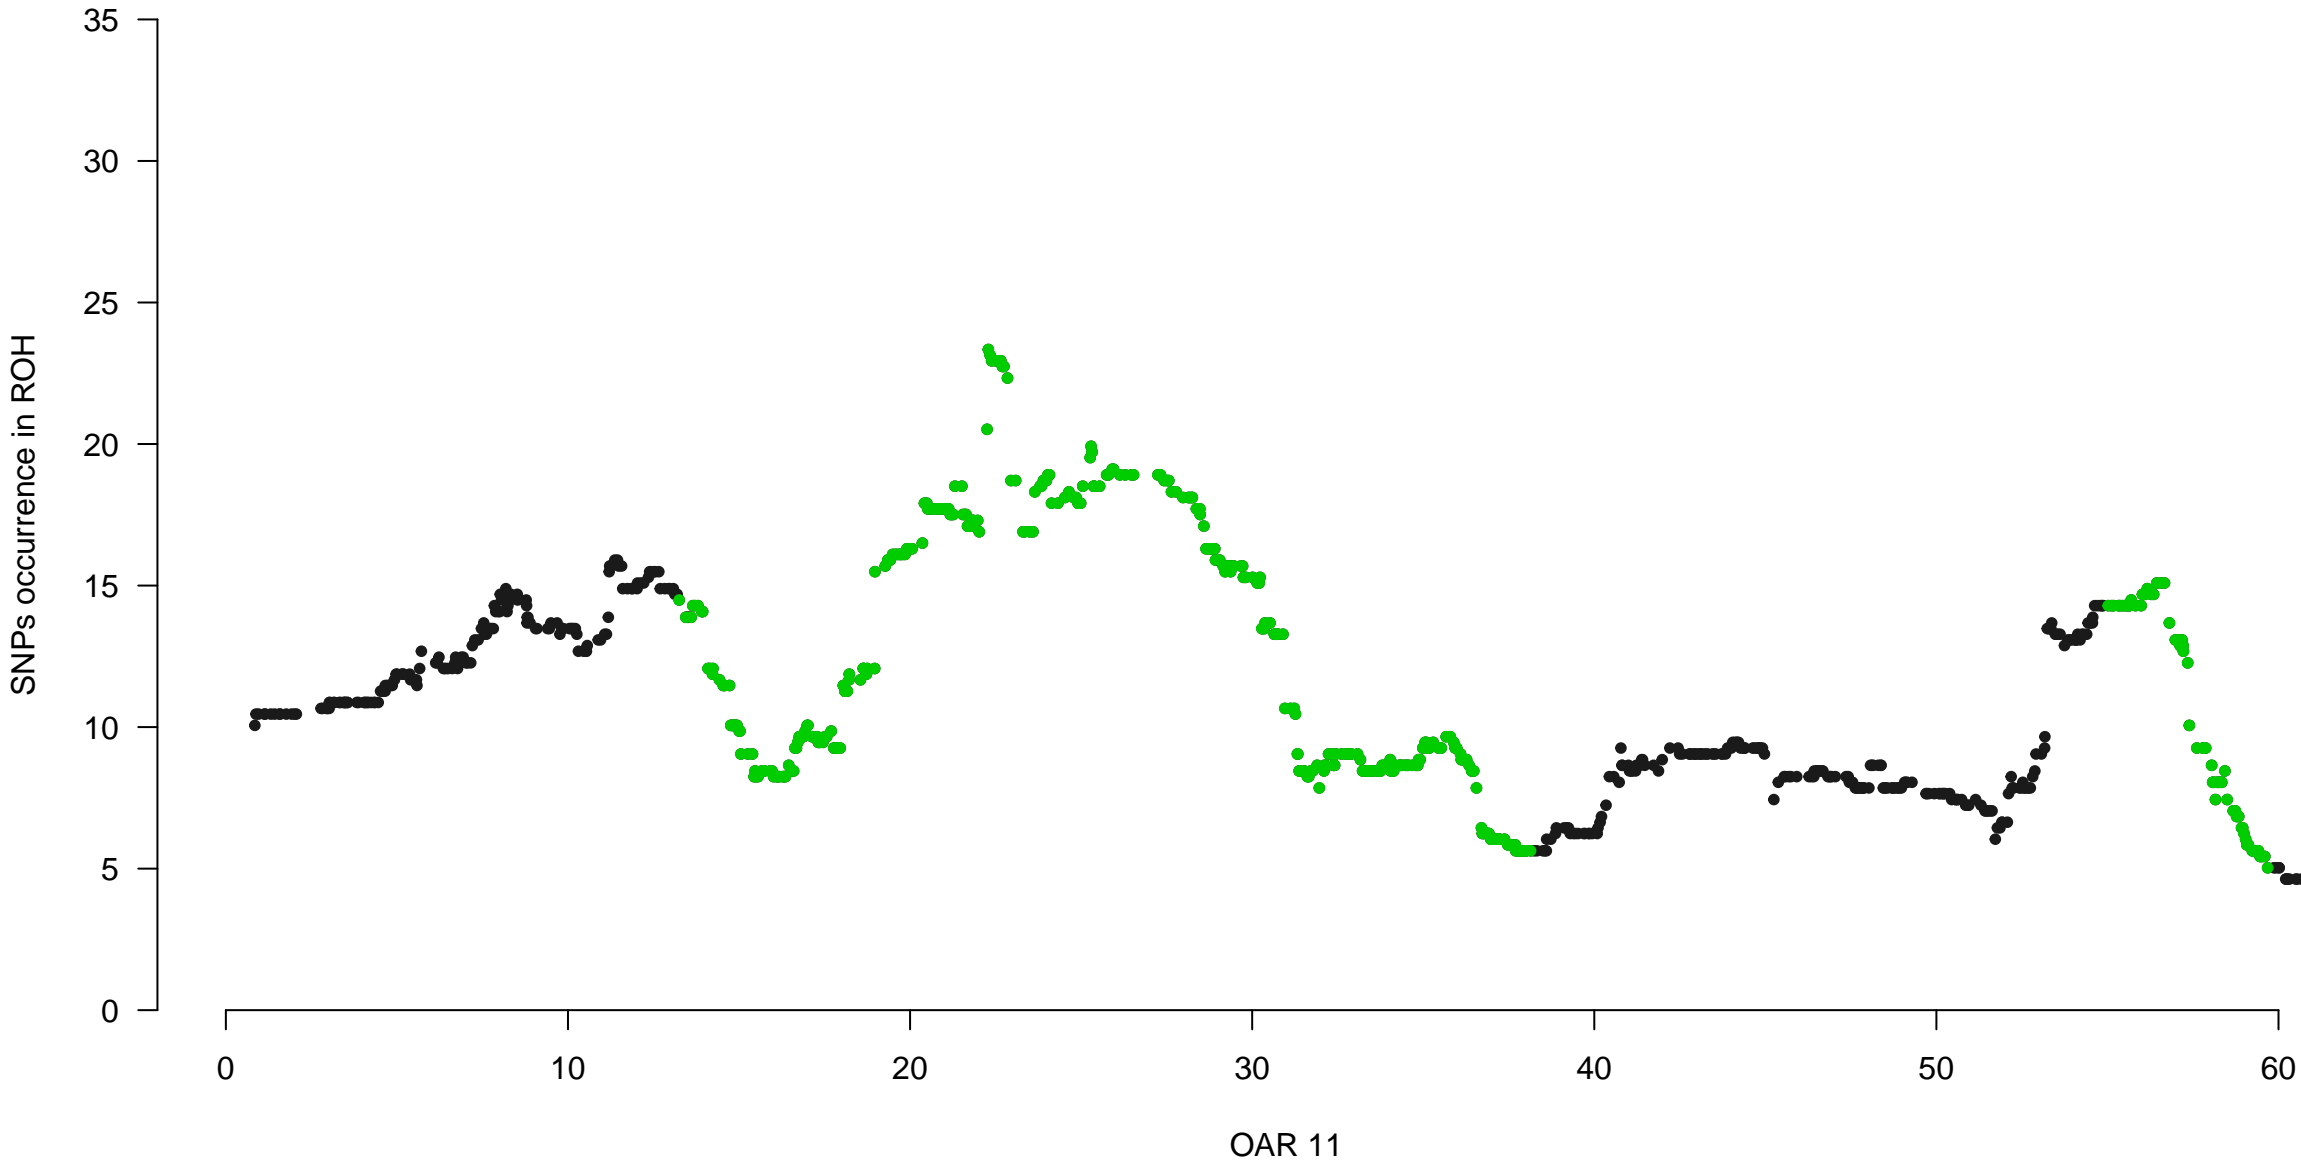

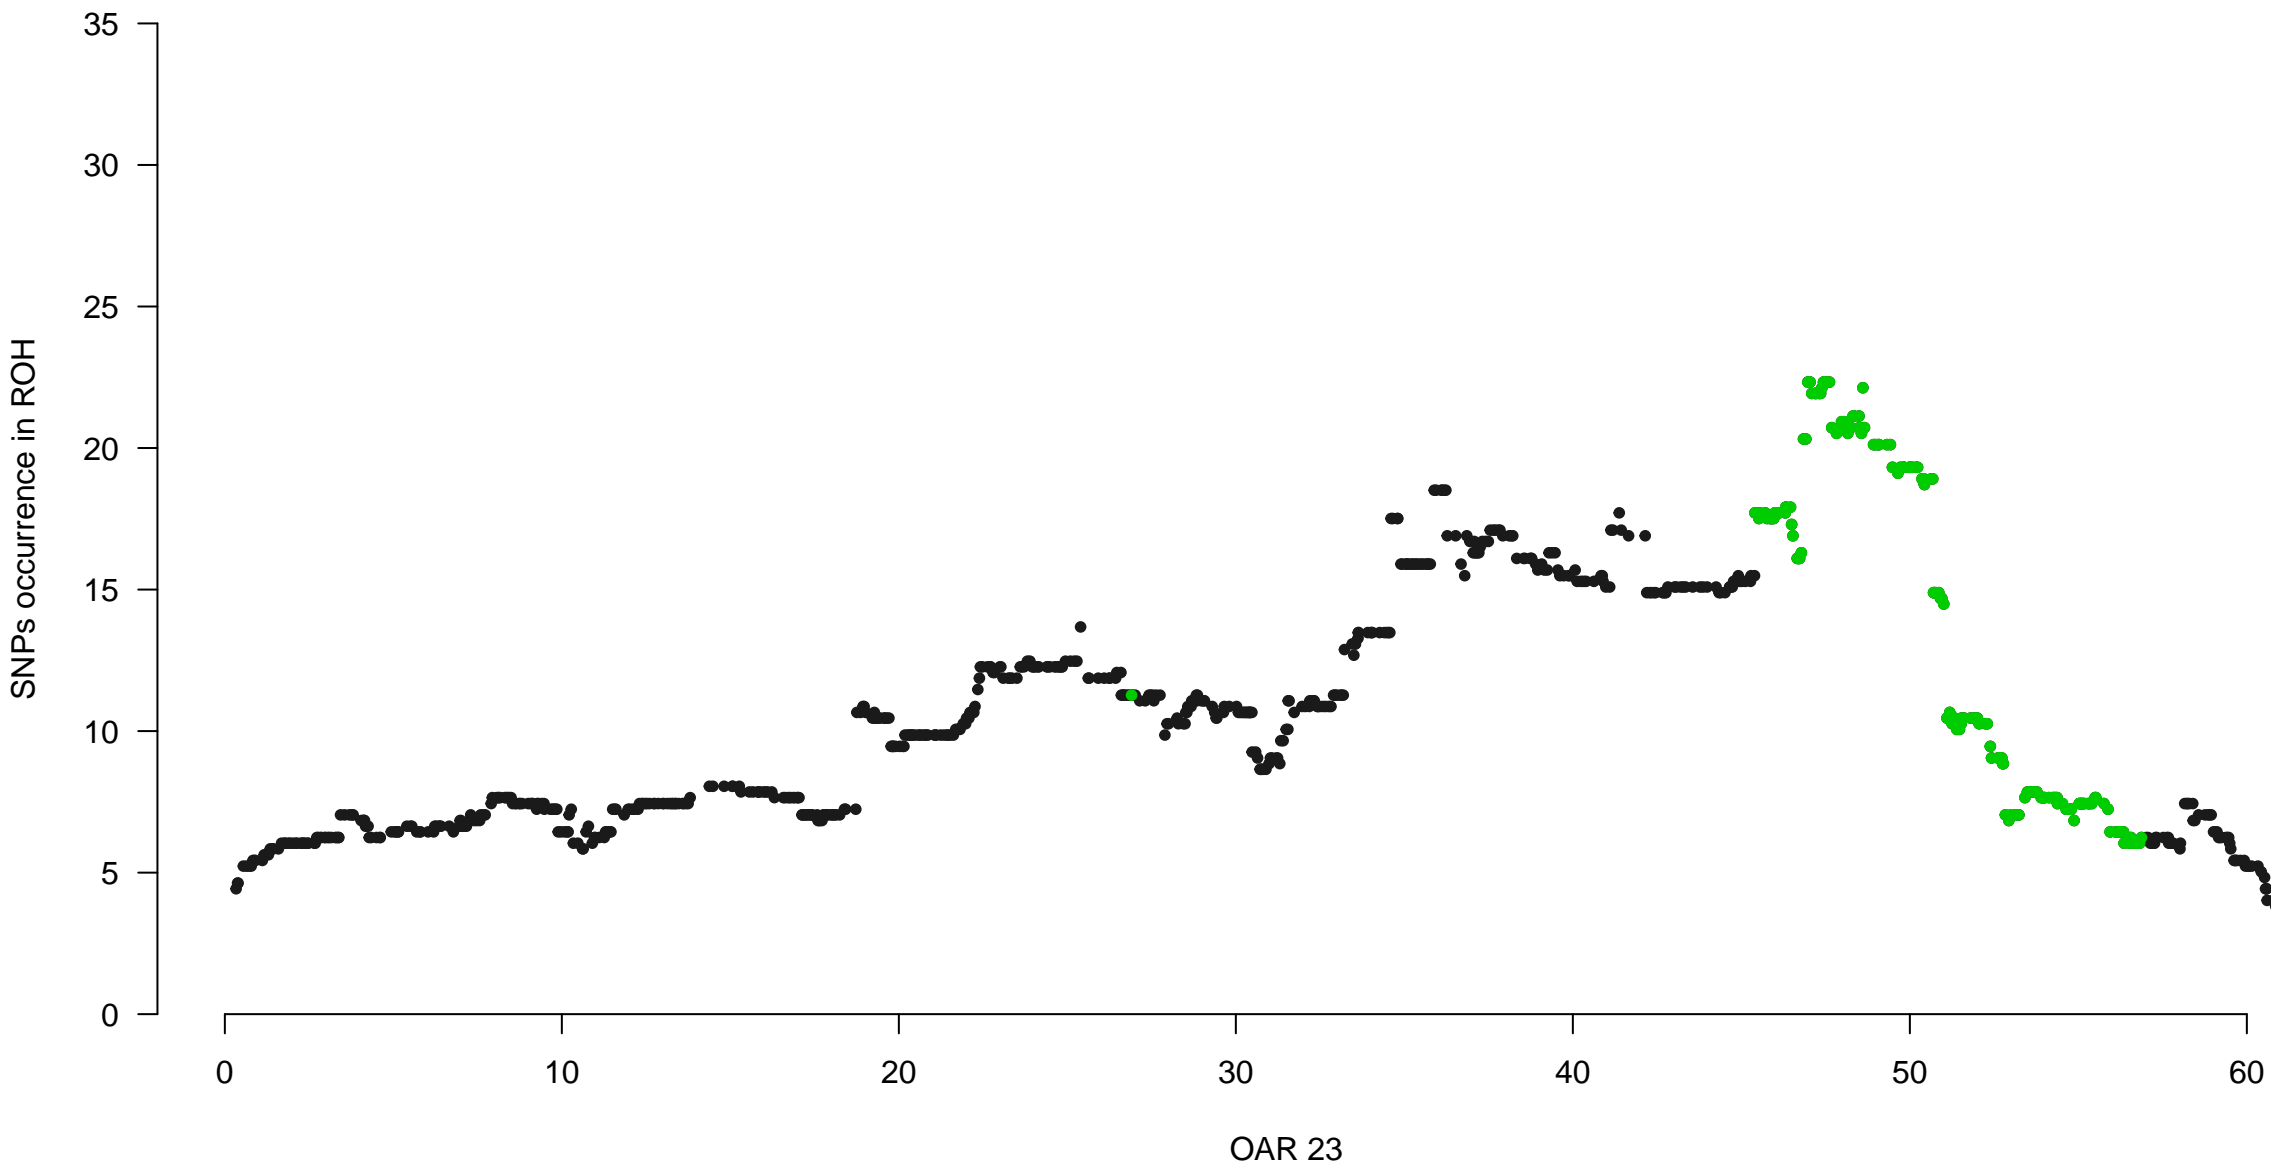

Supplement: MOESM3 [file 12711_2017_360_MOESM3_ESM.pdf]
